# Supplementary material for: Poly(vinyl alcohol)/phosphoric acid gel electrolyte@polydimethylsiloxane sponge for piezoresistive pressure sensors
Source: Royal Society of Chemistry journal article supplement (doi:10.1039/d1tb01467f), 2021-01-01
Supplement: d1tb01467f5.pdf [file d1tb01467f5.pdf]

Poly(vinyl alcohol)/Phosphoric acid Gel Electrolyte@  
Polydimethylsiloxane Sponge for Piezoresistive Pressure Sensors

*Shengping Yao,<sup>a</sup> Junhao Shen,<sup>a</sup> Yixin Guo,<sup>a,b</sup> Shaohua Zuo,<sup>a,b,\*</sup> Fuwen Shi,<sup>a,b,\*</sup> Jinchun*

*Jiang,<sup>a,b</sup> Junhao Chu<sup>a,b</sup>*

<sup>a</sup>School of Physics and Electronic Science, East China Normal University, Shanghai

200241, China

<sup>b</sup>Engineering Research Center of Nanoelectronic Integration and Advanced

Equipment, Ministry of Education

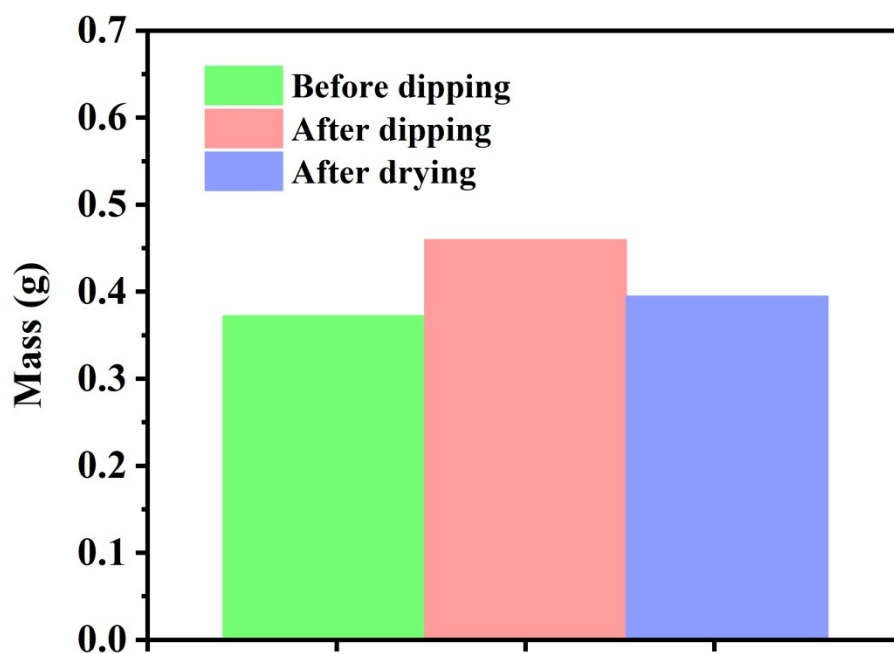

Fig. S1 Comparison of quality changes in sponge coating process.

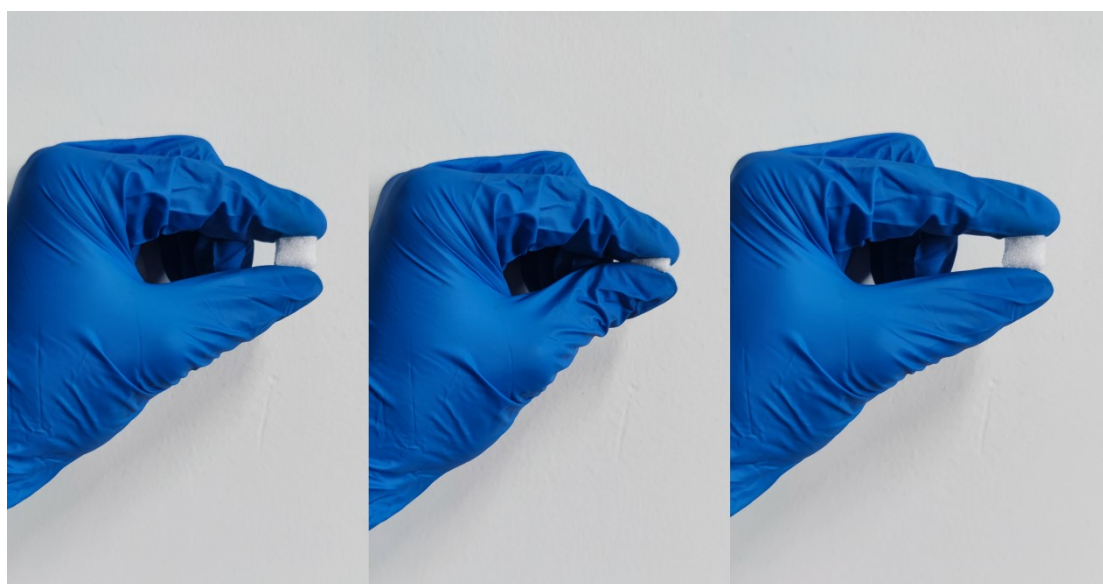

Fig. S2 Photographs of the PVA/H<sub>3</sub>PO<sub>4</sub>@PDMS sponge under a compressing-releasing cycle.

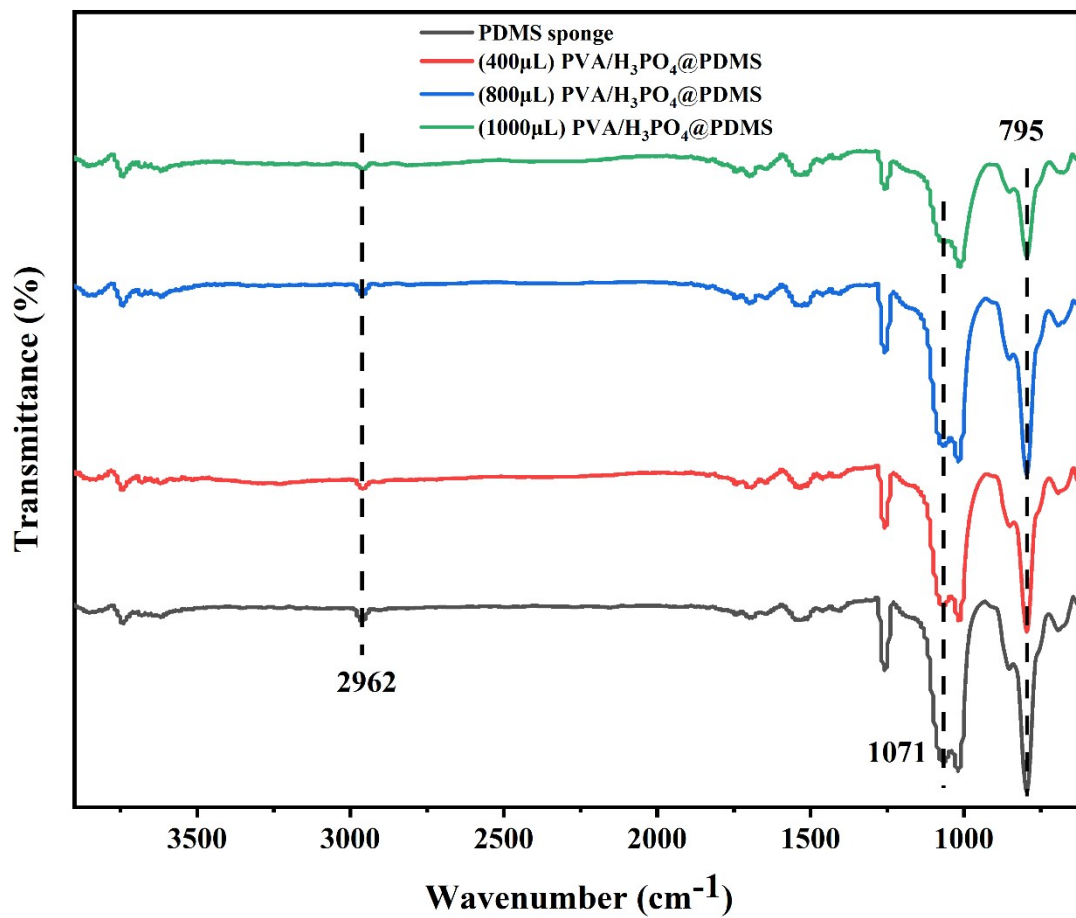

**Fig. S3** FTIR spectra of the PDMS sponge and PVA/ $\text{H}_3\text{PO}_4$ @PDMS composite prepared with the PVA/ $\text{H}_3\text{PO}_4$  gel electrolytes of different concentrations.

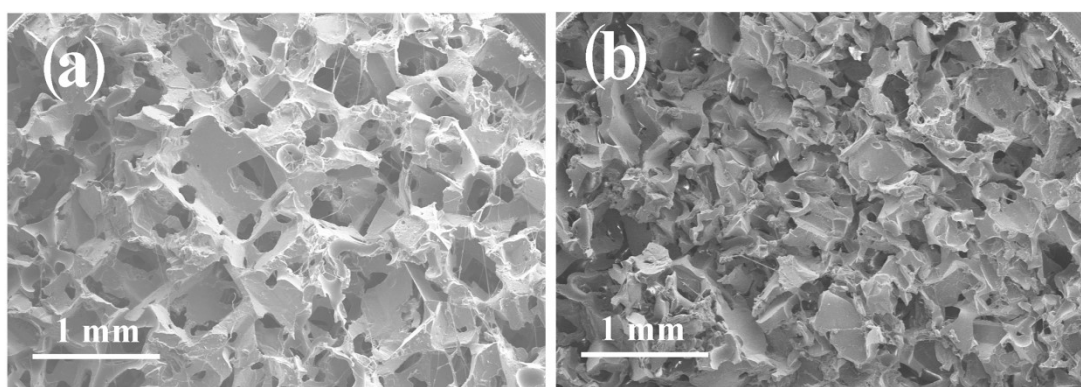

**Fig. S4** a) PVA/ $\text{H}_3\text{PO}_4$ @PDMS sponges under uncompressed state.

b) PVA/ $\text{H}_3\text{PO}_4$ @PDMS sponges under compressed state.

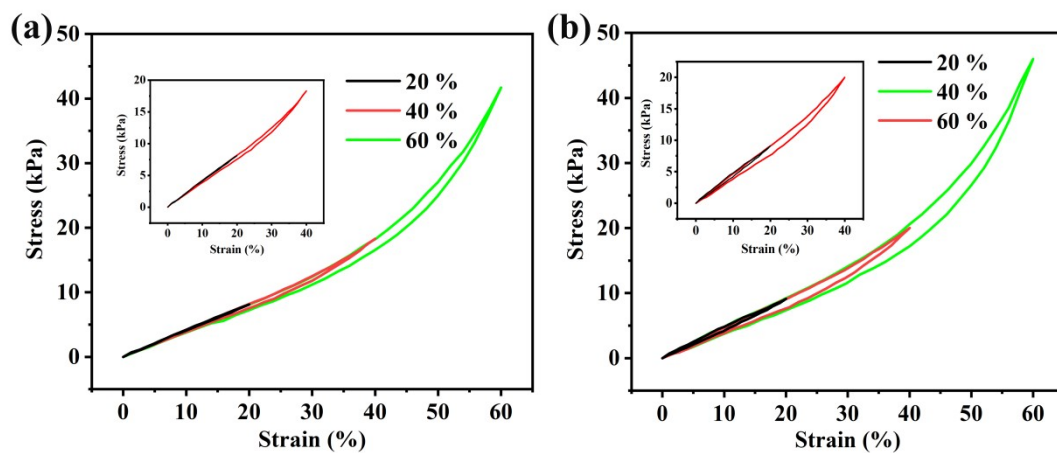

**Fig. S5** Compressive stress–strain curves of (a) PDMS sponge and (b) PVA/H<sub>3</sub>PO<sub>4</sub>@PDMS sponge at maximum strains of 20, 40 and 60% , respectively.

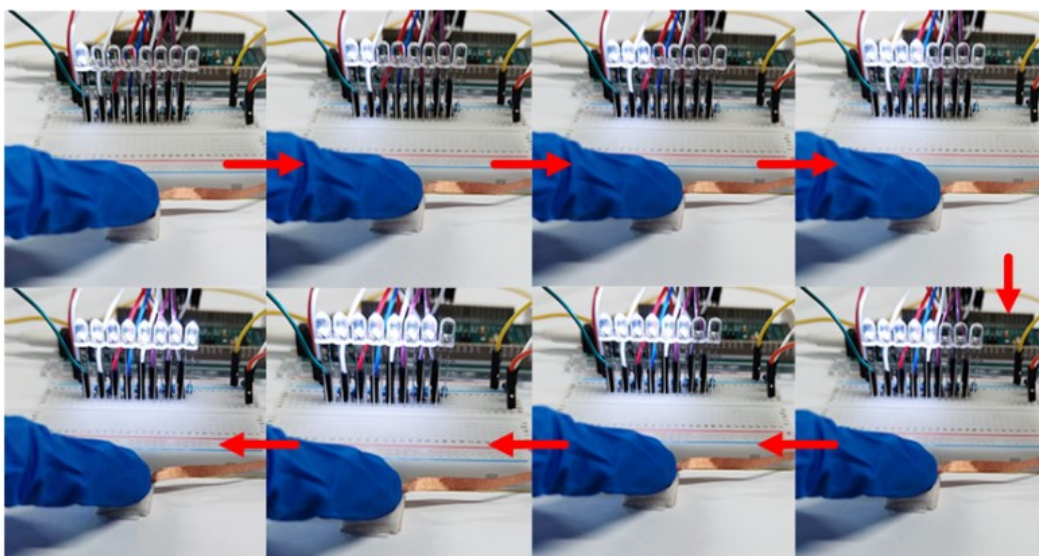

**Fig. S6** Demonstration of piezoresistive characteristics of PVA/H<sub>3</sub>PO<sub>4</sub>@PDMS sponges.

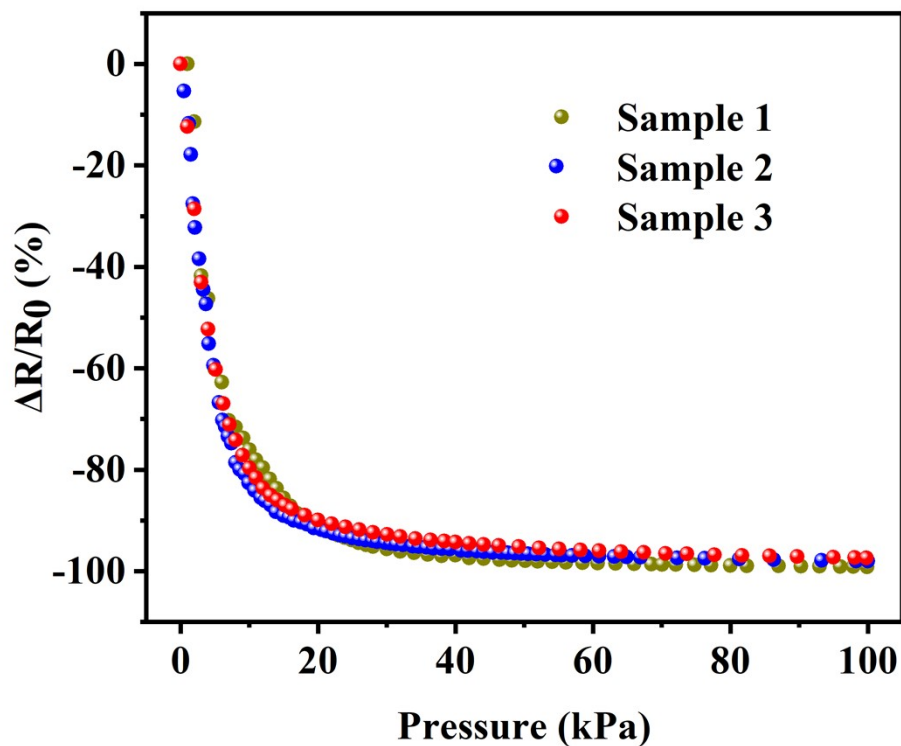

Fig. S7 Reproducibility test for resistance change with the pressure of the PVA/H<sub>3</sub>PO<sub>4</sub>@PDMS sponge-based pressure sensors in different batches.

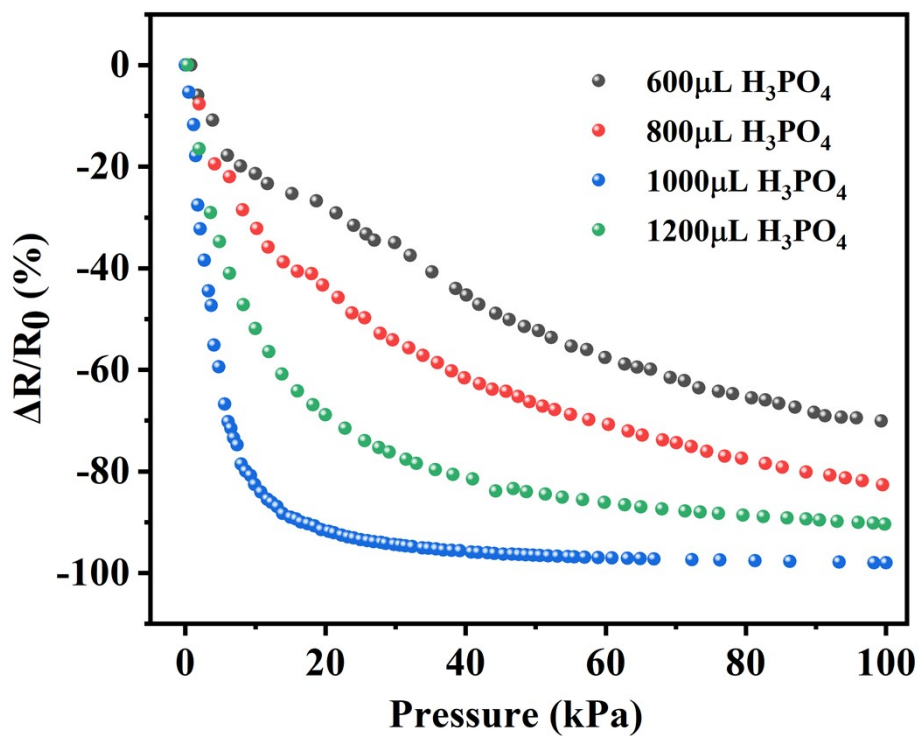

Fig. S8 Pressure sensing performance of PVA/H<sub>3</sub>PO<sub>4</sub>@PDMS sponge with different phosphoric acid addition.

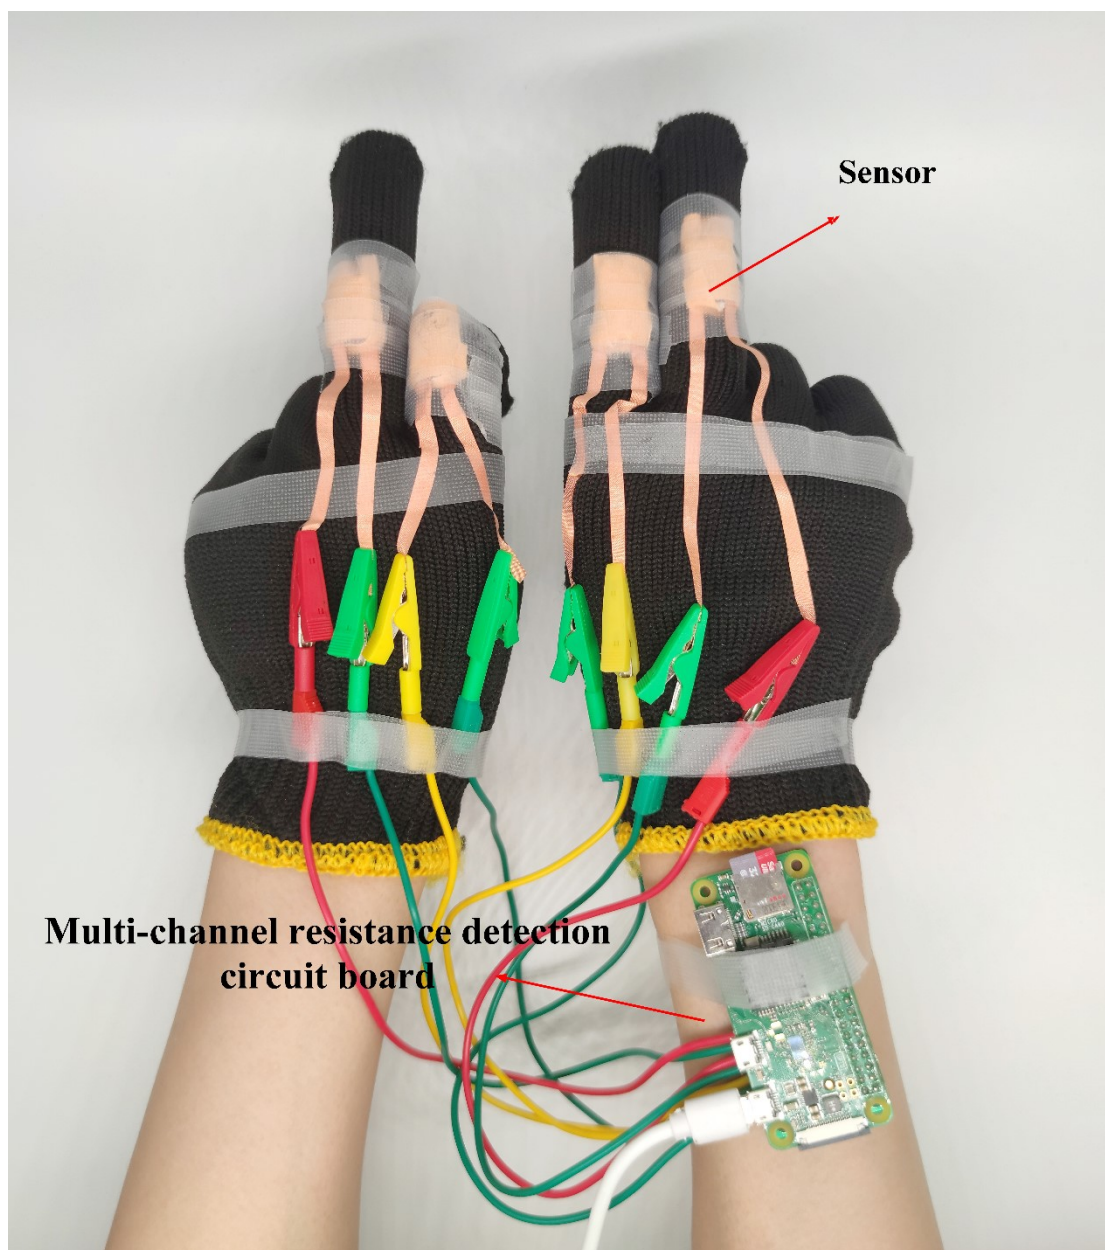

**Fig. S9** Photographs of multi-channel resistance detection circuit board and PVA/H<sub>3</sub>PO<sub>4</sub>@PDMS sponge-based sensors.
